# Supplementary material for: Kinetics and outer sphere electron transfer of some metallosurfactants by Fe(CN)6 4− in microheterogenous medium: a detailed thermodynamic approach
Source: publisher site journal article supplement (doi:10.1515/zpch-2023-0338), 2023-11-27
Supplement: Supplementary file 1 [file j_zpch-2023-0338_suppl_001.docx]

**Supplementary Information’s (SI Figures)**

**SI Figures**

**SI Figure 1** Graph of *k* versus [ionic liquids] for cis-[M(TRE)(DOD)2]3+ at various temperatures.

**SI Figure 2** Graph of *k* versus [ionic liquids] for -[M(bpy)2(DOD)2]3+ at various temperatures.

**SI Figure 3** Graph of *k* versus [ionic liquids] for cis-[M(PA)2(DOD)2]3+at various temperatures.

**SI Figure 4** Observing graphfor cis-[M(TRE)(DOD)2]3+  in ionic liquids medium. [Co(III)] = 4×10-4 mol dm-3; [Fe(CN)6 4-] = 0.1 mol dm-3; [*μ*] = 1.0 mol dm-3, [ionic liquids] = 2×10-5

**SI Figure 5** Observing graphfor [M(bpy)2(DOD)2]3+in ionic liquids medium. [Co(III)] = 4×10-4 mol dm-3; [Fe(CN)6 4-] = 0.1 mol dm-3; [*μ*] = 1.0 mol dm-3, [ionic liquids] = 2×10-5

**SI Figure 6** Observing graphfor cis-[M(PA)2(DOD)2]3+in ionic liquids medium. [Co(III)] = 4×10-4 mol dm-3; [Fe(CN)6 4-] = 0.1 mol dm-3; [*μ*] = 1.0 mol dm-3, [ionic liquids] = 2×10-5

**SI Figure 7** Consistent pace graph for the reduction of cis-[M(ED)2(DOD)2]3+ by Fe(CN)6 4-

**SI Figure 8** Consistent pace graph for the reduction of cis-[M(DP)2(DOD)2]3+ by Fe(CN)6 4-

**SI Figure 9** Consistent pace for the reduction of cis-[M(TRE)( DOD)2]3+  by Fe(CN)6 4-

**SI Figure 10** Consistent pace graph for the reduction of [M(bpy)2(DOD)2]3+by Fe(CN)6 4-

**SI Figure 11** Consistent pace graph for the reduction of cis-[M(PA)2(DOD)2]3+by Fe(CN)6 4-

**Tables**

**SI Table 1** Second order rate constants for the reduction of cobalt(III) complex ion by Fe(CN)6 4- in the presence of ionic liquids, cis-[M(TRE)(DOD)2]3+ = 4 ×10-4mol dm-3, *μ* = 1.0 moldm−3, [Fe(CN)6 4-] = 0.1 mol dm-3

**SI Table 2** Second order rate constants for the reduction of cobalt(III) complex ion by Fe(CN)6 4- in the presence of ionic liquids, cis-[M(bpy)2(DOD)2]3+ = 4 ×10-4mol dm-3, *μ* = 1.0 moldm−3, [Fe(CN)6 4-] = 0.1 mol dm-3

**SI Table 3** Second order rate constants for the reduction of cobalt complexes by Fe(CN)6 4- in the presence of ionic liquids, cis-[M(PA)2(DOD)2]3+= 4 ×10-4 mol dm-3, *μ* = 1.0 moldm−3, [Fe(CN)6 4-] = 0.1 mol dm-3

**SI Table 4** Stimulation factors for the reduction of cis-[M(TRE)( DOD)2]3+, *μ* = 1.0 moldm−3

**SI Table 5** Stimulation factors for the reduction of cis-[M(bpy)2(DOD)2]3+, *μ* = 1.0 moldm−3

**SI Table 6** Stimulation factors for the reduction of cis-[M(PA)2(DOD)2]3+, *μ* = 1.0 moldm−3

**Figures**

SI Fig. 1

SI Fig. 2

SI Fig. 3

SI Fig. 4

SI Fig. 5

Si Fig.6

SI Fig. 7

SI Fig. 8

SI Fig. 9

SI Fig.10

SI Fig. 11

**Tables**

SI Table 1

| [(BMIM)Br] × 103,mol dm-3 | k ×102, dm3 mol-1 s-1 | | | | | |
| --- | --- | --- | --- | --- | --- | --- |
|  | 298K | 303K | 308K | 313K | 318K | 323K |
| 1.4 | 3.5 | 3.7 | 5.7 | 7.9 | 13.9 | 21.3 |
| 1.6 | 4.2 | 4.8 | 6.8 | 11.1 | 19.3 | 24.6 |
| 1.8 | 4.8 | 6.9 | 8.1 | 23.8 | 30.2 | 32.8 |
| 2.0 | 6.1 | 8.8 | 14.8 | 27.7 | 33.8 | 48.6 |
| 2.2 | 6.6 | 10.2 | 17.9 | 29.1 | 41.3 | 57.6 |
| 2.4 | 9.9 | 14.6 | 21.6 | 31.9 | 44.5 | 62.6 |
| 2.6 | 10.2 | 18.9 | 23.2 | 33.3 | 57.2 | 74.6 |
| 2.8 | 10.6 | 19.2 | 23.9 | 34.2 | 58.5 | 75.1 |

SI Table 2

| [(BMIM)Br] × 103,mol dm-3 | k ×102, dm3 mol-1 s-1 | | | | | |
| --- | --- | --- | --- | --- | --- | --- |
|  | 298K | 303K | 308K | 313K | 318K | 323K |
| 1.4 | 4.0 | 4.2 | 6.5 | 8.7 | 14.5 | 22.9 |
| 1.6 | 5.0 | 5.4 | 7.6 | 11.8 | 20.4 | 27.2 |
| 1.8 | 5.9 | 7.1 | 8.2 | 25.3 | 32.8 | 33.5 |
| 2.0 | 6.3 | 9.2 | 15.4 | 28.5 | 34.3 | 51.3 |
| 2.2 | 10.1 | 15.0 | 21.9 | 31.9 | 44.8 | 67.0 |
| 2.4 | 10.9 | 19.3 | 23.9 | 34.1 | 58.1 | 77.1 |
| 2.6 | 11.2 | 21.3 | 24.6 | 35.9 | 60.5 | 79.8 |

SI Table 3

| [(BMIM)Br] ×103,mol dm-3 | k ×102, dm3 mol-1 s-1 | | | | | |
| --- | --- | --- | --- | --- | --- | --- |
|  | 298K | 303K | 308K | 313K | 318K | 323K |
| 1.4 | 3.7 | 4.0 | 6.2 | 8.2 | 14.2 | 22.2 |
| 1.6 | 4.9 | 5.3 | 7.5 | 11.6 | 20.2 | 25.1 |
| 1.8 | 5.8 | 7.0 | 8.1 | 24.7 | 30.8 | 33.2 |
| 2.0 | 6.2 | 9.1 | 15.1 | 28.2 | 34.2 | 51.1 |
| 2.2 | 6.7 | 10.1 | 14.1 | 29.6 | 42.2 | 58.7 |
| 2.4 | 9.9 | 14.9 | 22.2 | 32.4 | 45.5 | 63.5 |
| 2.6 | 10.8 | 20.1 | 24.5 | 34.5 | 58.5 | 77.5 |
| 2.8 | 11.5 | 21.5 | 25.0 | 35.0 | 60.4 | 79.5 |

SI Table 4

| [(BMIM)Br]× 103,  mol dm-3 | ∆H‡ kJ mol-1 | ∆S‡ JK-1 mol-1 |
| --- | --- | --- |
| 1.4 | 1.24 | -194.7 |
| 1.6 | 1.26 | -193.3 |
| 1.8 | 2.01 | -172.5 |
| 2.0 | 3.43 | -135.9 |
| 2.2 | 4.57 | -106.0 |
| 2.4 | 5.78 | -74.2 |
| 2.6 | 6.33 | -59.4 |
| 2.8 | 8.00 | -15.8 |

SI Table 5

| [(BMIM)Br]× 103,  mol dm-3 | ∆H‡ kJ mol-1 | ∆S‡ JK-1 mol-1 |
| --- | --- | --- |
| 1.4 | 1.24 | -51.5 |
| 1.6 | 1.26 | -47.5 |
| 1.8 | 2.01 | -37.3 |
| 2.0 | 3.43 | -34.6 |
| 2.2 | 4.57 | -30.5 |
| 2.4 | 5.78 | -24.5 |
| 2.6 | 6.33 | -9.6 |
| 2.8 | 8.02 | 1.9 |

SI Table 6

| [(BMIM)Br]× 103,  mol dm-3 | ∆H‡ kJ mol-1 | ∆S‡ JK-1 mol-1 |
| --- | --- | --- |
| 1.4 | 6.57 | -51.5 |
| 1.6 | 6.66 | -47.2 |
| 1.8 | 6.80 | -35.9 |
| 2.0 | 6.91 | -31.3 |
| 2.2 | 6.97 | -30.1 |
| 2.4 | 7.48 | -22.6 |
| 2.6 | 7.85 | -10.5 |
